# Supplementary material for: A Preliminary Assessment of Young Water Fractions in Groundwater from Alluvial Aquifers Facing the Northern Italian Apennines
Source: MDPI journal article supplement (doi:10.3390/w14040659), 2022-02-20
Supplement: s1 [file s1]

Archive with 2 entries (2 files):
- S1.xlsx
- S2.pdf
