# Supplementary material for: A Preliminary Assessment of Young Water Fractions in Groundwater from Alluvial Aquifers Facing the Northern Italian Apennines
Source: MDPI journal article supplement (doi:10.3390/w14040659), 2022-02-20
Supplement: s1 [file s1 › S1.xlsx]

## Sheet: pozzi
Code	XUTM-ED50	YUTM-ED50	Altitude -A (a.s.l)	Well Depth WD (m b.g.l.)	Slotting	Number of filters	Filter from (m b.g.l.)	Filter to (m b.g.l.)	Max value of O18	Min value of O18	Fyw	Alluvial fan	DS (m)	DAP (m)	Tritium (2nd campaign)	Tritium
1	616885	945679	135	60	Unique filter		40	60	-8.71	-8.87	0.0751174	ENZA	4849.25	6031.63	14.3	-
2	624192	950646	57.8	63	Unique filter	1	60	63	-8.41	-8.58	0.0798122	ENZA	9984.12	14830	-	-
3	613499	948103	116	57	Unique filter	1	43	48	-8.23	-8.51	0.131455	ENZA	974.841	5939.83	-	-
4	626462	963144	24.1	188	Unique filter	1	183	188	-9.43	-10.53	0.516432	ENZA	12576.5	25319.1	-	-
5	618437	958593	39	120	Unique filter	1	86	89	-8.62	-8.87	0.117371	ENZA	5354	17683	-	-
6	616090	965592	33.42	113	Unique filter	1	110	113	-9.17	-9.31	0.0657277	ENZA	934.298	23213.4	-	-
7	609870	944520	165	50	Unique filter	1	32	47	-8.9	-9.24	0.159624	ENZA	755.348	3299.56	0.8	-
8	606730	949000	147	40	Unique filter	1	35	40	-8.2	-8.6	0.187793	ENZA	5322.84	8556.63	-	-
9	608680	950710	129	87	Unique filter	1	65	87	-8	-8.38	0.178404	ENZA	3942.87	8031.26	-	-
10	730832	908497	33	45	Unique filter	1	35	44.88	-8.11	-8.25	0.041791	LAMONE	244.192	8115.17	9.7	-
11	722971	911689	39.84	37.2	Unique filter	1	29	35.2	-7.94	-8.06	0.0358209	LAMONE	7290.86	9190.14	13.9	-
12	752765	930572	1.6	230.08	Unique filter	1	218	230.08	-9.66	-10.14	0.143284	LAMONE	2705.97	39223.2	-	-
13	724020	919980	19.91	76	Unique filter			76	-7.86	-8.19	0.0985075	LAMONE	6863.85	17262.6	-	-
14	719909	913086	58.8	97	Unique filter			97	-6.78	-8.34	0.465672	LAMONE	4395.51	11655.1	-	-
15	721065	916070	31.2	62	Multifilters	4	47	61	-7.89	-8.1	0.0626866	LAMONE	6917.36	14080.5	6.2	4.7
16	784329	886753	2.3	90	Unique filter	1	82	85.3	-8.28	-8.421	0.069793	MARECCHIA	900	15470	4.4	3.9
17	777670	884250	35.3	58	Unique filter	1	48	54	-7.824	-8.35	0.260623	MARECCHIA	616	9334	9.3	-
18	784080	885274	6.6	31	Unique filter	1	25.4	28.4	-7.21	-7.41	0.099108	MARECCHIA	80	14325	-	-
19	562510	969893	164.3	92	Multifilters	2	59	90	-8.72	-8.89	0.0674603	NURE	8823	11740	0.9	-
20	560682	984509	67.14	114.5	Multifilters	4	89	114.5	-8.52	-8.79	0.107143	NURE	192	18186	-	-
21	568900	984289	53.25	86	Unique filter	1	69.5	76.5	-9.1	-9.26	0.0634921	NURE	7043.38	23607	-	-
22	662375	939518	42	123	Multifilters	4	75	121	-8.92	-9.24	0.122822	PANARO	4201	16284	-	-
23	668000	939675	36	52	Unique filter	1	42	48	-8.68	-8.88	0.0767636	PANARO	9769	19253	-	-
24	663015	943476	33.3	62	Unique filter			62	-9.04	-9.17	0.0498964	PANARO	7846.39	20321.1	-	-
25	685220	960220	13.5	190	Multifilters	2	150	190	-10.9	-10.99	0.0346154	RENO	1065.96	34695.1	-	-
26	690664	964256	17.88	140.2	Multifilters	3	72.12	140.19	-10.06	-10.4	0.130769	RENO	3555.5	39544.9	-	-
27	734755	941987	4.4	149.96	Unique filter	1	143.44	149.96	-10.26	-10.34	0.0307692	RENO	2682.82	50117.2	-	-
28	745126	953244	-1.09	145	Unique filter	1	128	145	-8.47	-10.07	0.615385	RENO	15364	95094	-	-
29	708271	968009	6	140	Unique filter	1	126	140	-8.68	-10.84	0.830769	RENO	14094	59910	-	-
30	702739	970638	7	60	Unique filter	1	42	60	-8.29	-8.54	0.0961538	RENO	14022	56760	0.7	-
31	748062	959778	-1	90	Unique filter	1	83	90	-8.28	-8.53	0.0961538	RENO	22558	97395	-	-
32	681005	954893	15	124	Unique filter	1	115	124	-9.52	-9.75	0.0884615	RENO	320.191	30267.7	-	-
33	714370	943100	7.3	190	Unique filter	1	175	183.75	-9.41	-9.76	0.134615	RENO	3532	62735	-	-
34	692650	929600	49.17	104	Multifilters	6	52.5	97.5	-8.64	-8.81	0.0653846	RENO	9980	13091	-	-
35	712368	945463	7.74	176	Unique filter	1	137	159	-10.2	-10.32	0.0461538	RENO	1417	56489	-	-
36	688585	936836	28.8	67	Unique filter	1	58	67	-8.59	-8.8	0.0807692	RENO	5251	13834	0.8	-
37	676655	934160	43.19	88.3	Unique filter	1	77.35	82.1	-8.84	-10.15	0.503846	RENO	9	9839.84	-	-
38	757465	896055	29	107	Unique filter	1	90	107	-7.81	-8.21	0.0851064	SAVIO	1477.44	9474.76	-	-
39	763724	917409	0.66	280	Unique filter	1	265	280	-10.43	-10.53	0.0212766	SAVIO	6063.4	31968.3	-	-
40	761328	923086	1.5	214	Unique filter	1	206.3	213.6	-9.7	-10	0.0638298	SAVIO	7401.21	35636.2	-	-
41	760410	896301	25.5	41	Unique filter	1	33	41	-8.15	-8.31	0.0340426	SAVIO	1300	10721	-	-
42	652118	953006	25.94	121	Unique filter	1	115	121	-9.68	-9.91	0.116338	SECCHIA	2463.5	28938.4	-	-
43	641450	942701	62.3	258	Unique filter	1	213	247	-9.01	-9.13	0.060698	SECCHIA	499.411	17713.1	13.2	14.3
44	651428	943730	37.16	82	Multifilters	2	64	75.5	-8.9	-9.1	0.101163	SECCHIA	7465	20902	16.9	16
45	643046	966123	22.6	225	Unique filter	1	220	225	-10.9	-11.17	0.136571	SECCHIA	16025.9	37933.7	-	-
46	646017	973088	18.7	81	Unique filter	1	67	81	-8.8	-10.14	0.677795	SECCHIA	10740.2	29609.9	-	-
47	641825	945499	53.38	305	Multifilters	6	243	295	-8.89	-9.26	0.187152	SECCHIA	650	17530	-	-
48	641211	949319	45.35	106	Unique filter	1	100	105	-8.87	-9.14	0.136571	SECCHIA	3380.62	21070.4	-	-
49	643511	959771	29.1	116	Unique filter	1	108	111	-10.9	-11.07	0.0859889	SECCHIA	13121.9	31782.8	-	-
50	660259	966804	23.33	59	Unique filter	1	53	58	-10.58	-10.74	0.0809307	SECCHIA	2990.22	44953.1	-	-
51	647701	942140	52	51	Unique filter	1	42	51	-8.9	-9.07	0.0859889	SECCHIA	6031.67	17206.8	13.9	19.1
52	650107	936197	84	70	Multifilters	2	35	59.5	-8.71	-9.48	0.389479	SECCHIA	8537.49	14867.1	11.3	7.2
53	645746	936151	91.25	83.3	Multifilters	4	56	83.3	-8.81	-8.9	0.0455235	SECCHIA	4781	11620	-	-
54	641467	934486	109.85	23.5	Unique filter			23.5	-8.73	-8.82	0.0455235	SECCHIA	870	7473	-	-
55	650135	944825	36	71	Unique filter	1	61	71	-8.83	-8.97	0.0708144	SECCHIA	4500	20862	17.5	18
56	661378	954492	25	120	Unique filter	1	117	120	-10.39	-10.49	0.0383818	SECCHIA-PANARO			-	-
57	596678	949770	194	10.3	Unique filter			10.3	-8.79	-9.34	0.172956	TARO	7019	10484	-	-
58	591123	956130	104	13	Unique filter			13	-7.63	-7.92	0.091195	TARO			-	-
59	589923	963085	87.5	110	Unique filter			110	-8.78	-8.9	0.0377358	TARO	5468.05	15127.4	-	-
60	598190	950565	190.97	88	Unique filter			88	-8.34	-8.59	0.0786164	TARO	1693	8523	8.1	-
61	600785	956740	81	40	Unique filter	1	35	38	-8.76	-8.94	0.0566038	TARO	5468.05	15127.4	-	-
62	587720	965900	80	46	Unique filter	1	37	46	-6.97	-8.46	0.468553	TARO	8867.37	17540	-	-
63	583800	969960	67	175	Unique filter	1	170	175	-8.86	-10.09	0.386792	TARO	14360	21287	-	-
64	598990	982500	30	105	Unique filter			105	-8.13	-8.36	0.072327	TARO	405.911	36353.5	-	-
65	605400	963420	49.9	55	Multifilters	2	34	46	-8.03	-8.41	0.178404	TARO-ENZA	7654.9	22158	7.7	7.2
66	606453	961330	54.53	75.5	Multifilters	5	32	75.5	-8.07	-8.31	0.112676	TARO-ENZA	6644.33	11884.6	8.4	8.5
67	551549	980592	96.8	200	Unique filter	1	183	193	-8.95	-9.27	0.135593	TREBBIA	4584	13997	2.4	-
68	550026	975281	153.8	156	Multifilters	2	134	154	-8.58	-8.85	0.114407	TREBBIA	2839	4553	6.2	6.9
69	545117	982828	87.88	130	Unique filter	1	125	130	-8.32	-8.62	0.127119	TREBBIA	1563.04	10122.8	12	-
70	554456	983442	75.39	97	Multifilters	2	57	95	-7.65	-7.94	0.122881	TREBBIA	7884.75	13460.2	-	-
71	546539	977864	135	126	Unique filter	1	57	69.63	-8.85	-8.86	0.00423729	TREBBIA	523	5052	-	-
72	548402	983369	88.1	105	Unique filter	1	67	103	-7.32	-7.68	0.152542	TREBBIA	1712.84	10814.6	-	-
73	544904	984860	81.5	64	Multifilters	2	40	60	-7.74	-8.34	0.254237	TREBBIA	2058.65	12166.6	13.7	-
74	541883	983234	92.3	49	Unique filter	1	39	48	-7.8	-8.02	0.0932203	TREBBIA	4829.95	11342.4	-	-
75	543088	989436	64.02	42	Unique filter	1	41	42	-8.03	-8.28	0.105932	TREBBIA	5243	16916	-	-
