# Supplementary material for: A Preliminary Assessment of Young Water Fractions in Groundwater from Alluvial Aquifers Facing the Northern Italian Apennines
Source: MDPI journal article supplement (doi:10.3390/w14040659), 2022-02-20
Supplement: s1 [file s1 › S2.pdf]

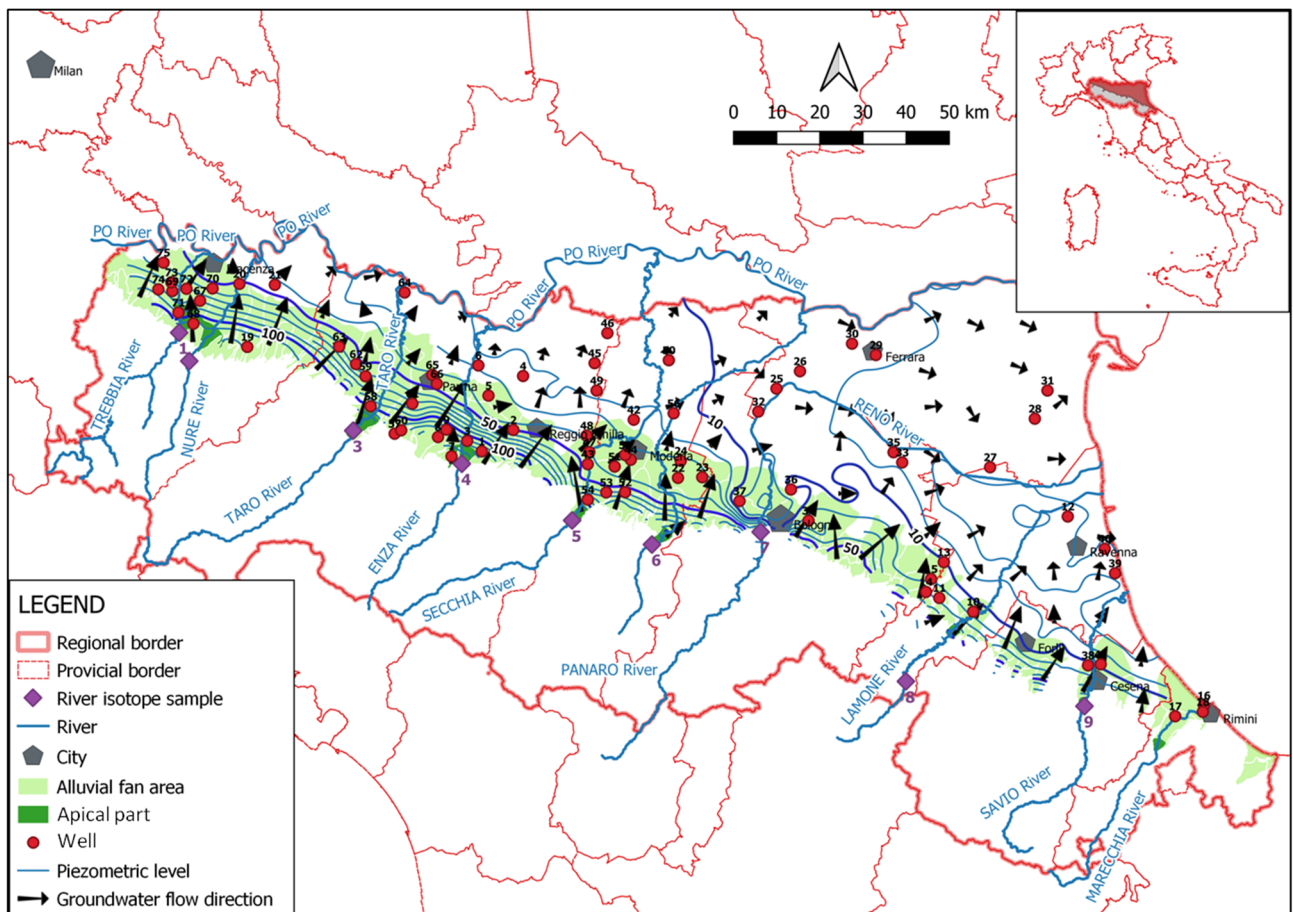

Figure S1: Interpolated piezometric surfaces and resulting shortest flow nets along with the 75 wells. Alluvial fans and the corresponding apical parts are also reported.
